# Supplementary material
Source: MDPI journal article supplement (https://www.mdpi.com/2073-4352/9/2/85)

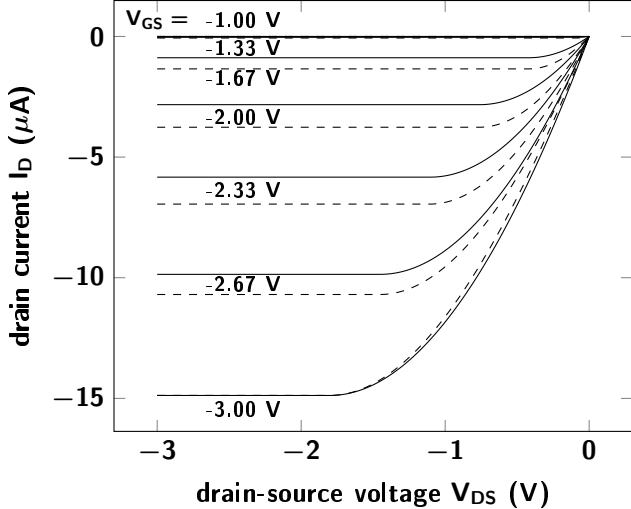

Supplement: s1 [file s1]

$L = 2\ \mu\text{m}$ ,  $W = 20\ \mu\text{m}$ 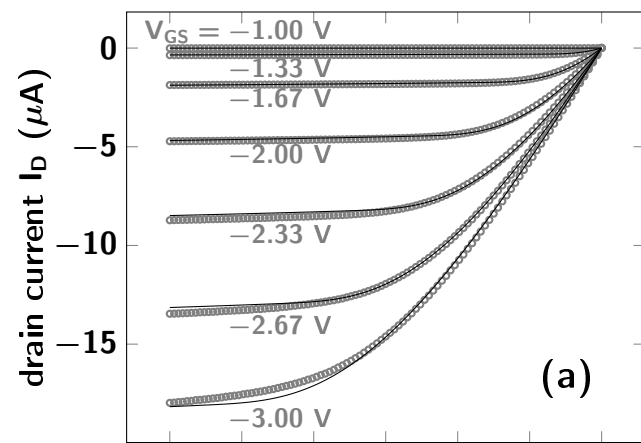 $L = 8\ \mu\text{m}$ ,  $W = 200\ \mu\text{m}$ 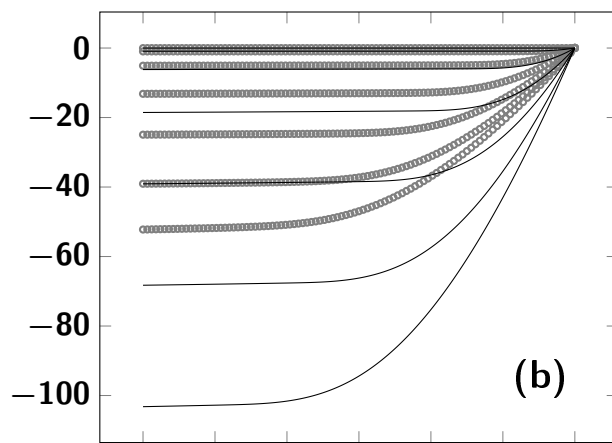 $L = 40\ \mu\text{m}$ ,  $W = 200\ \mu\text{m}$ 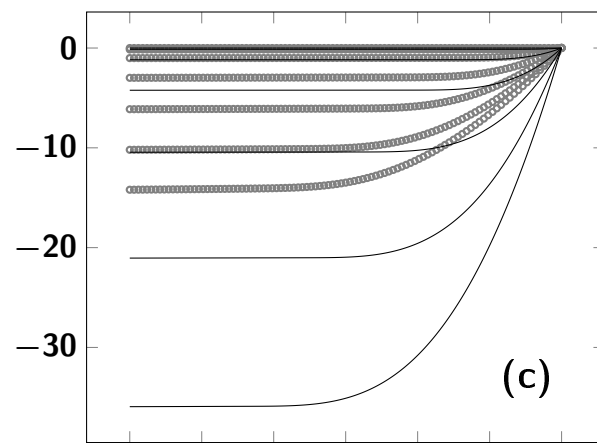 $L = 80\ \mu\text{m}$ ,  $W = 200\ \mu\text{m}$ 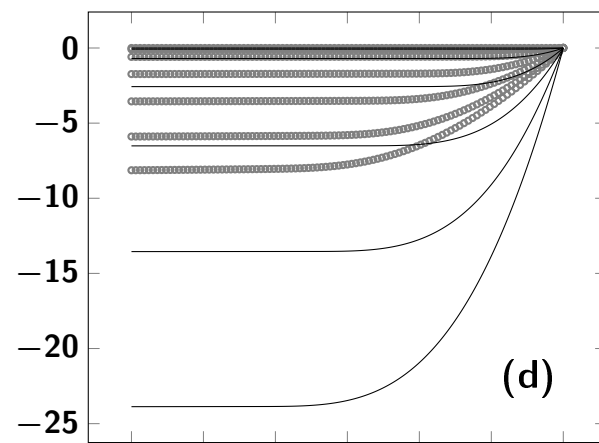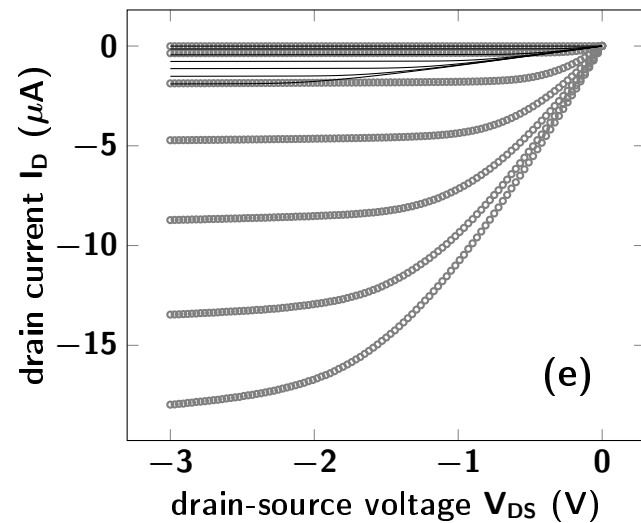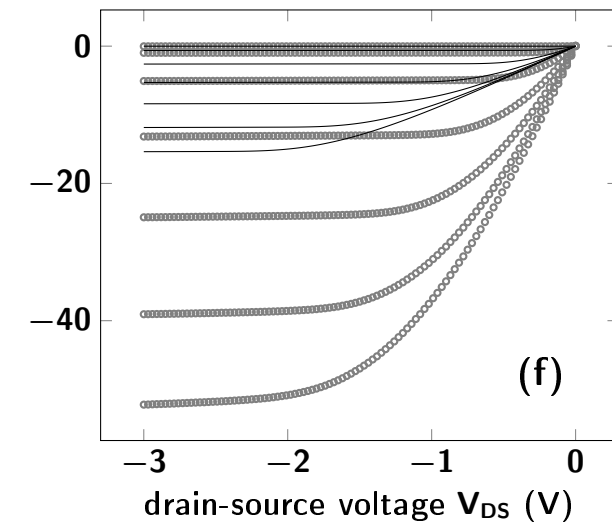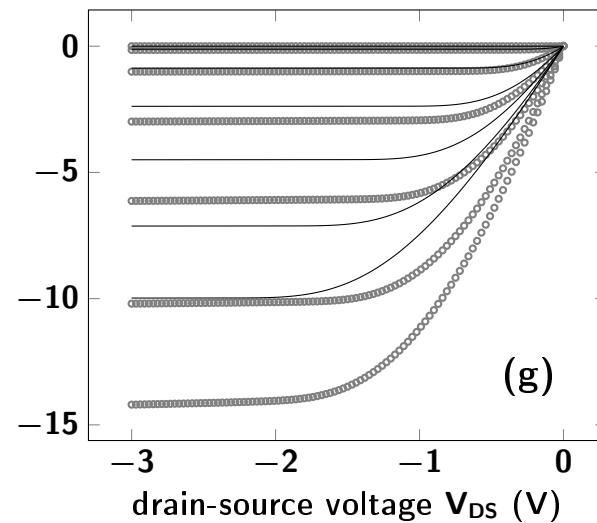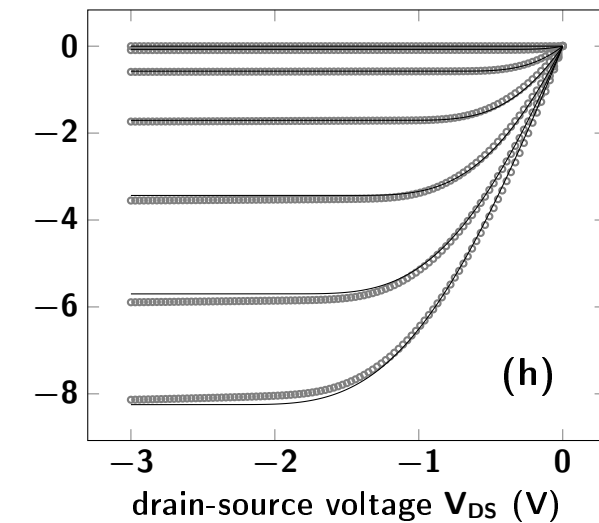

Supplement: s1 [file s1]

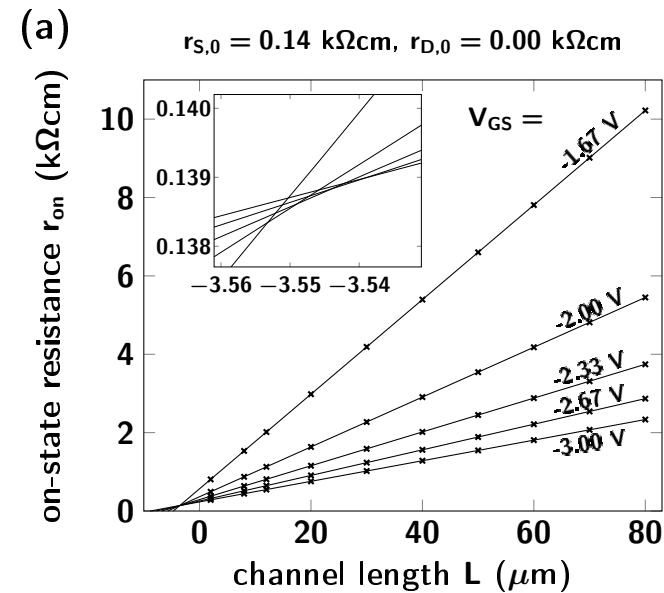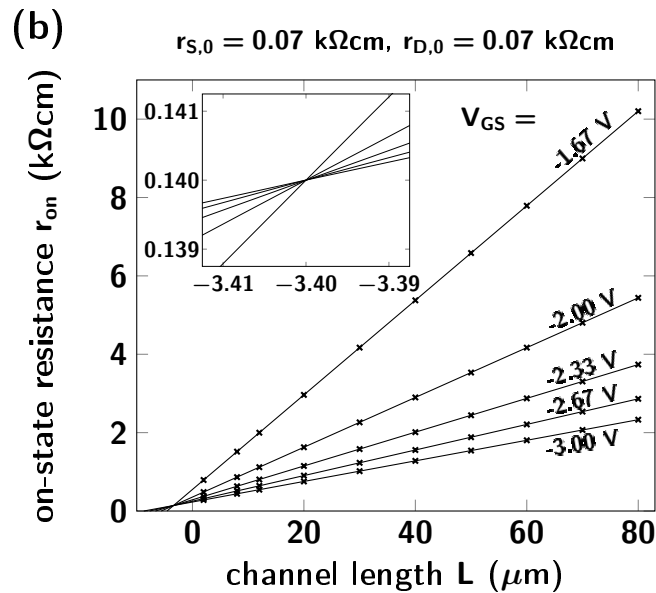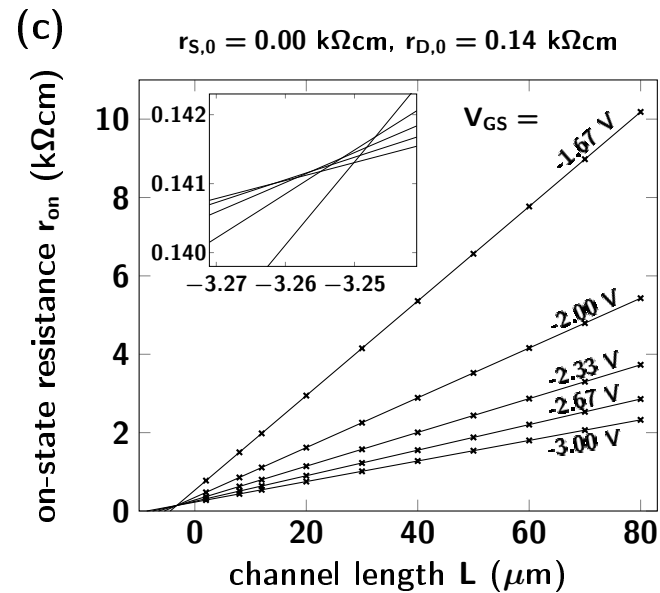

Supplement: s1 [file s1]
